# Supplementary material
Source: PubMed Central journal article supplement (PMC4031937)
Supplement: supp_M044487_jlr.M044487-7.pdf [file supp_M044487_jlr.M044487-7.pdf]

**Supplemental Table 2. Primer and probe sequences for metabolic genes.** Taqman chemistry was used and all probes were 5` FAM and 3` BlackHole quencher modified. Some genes were purchased from Applied Biosystems. The amplicon formula weight (F.W.) is given and was used in the calculation for generating the standard regression curves.

| Gene Name                                             | Reference Seq. | Forward                | Probe                         | Reverse                | F.W. (g/mol) |
|-------------------------------------------------------|----------------|------------------------|-------------------------------|------------------------|--------------|
| ACC, Acetyl-CoA-Carboxylase alpha                     | XM_109883.     | TGAGGTATCACCATCAGCCT   | CATGCCGGGCCATTGGTATTGG        | CCAGCCGGACAAGGTAAGC    | 20969        |
| ACLY, ATP Citrate Lyase                               | NM_134037.     | GATGAAGTGGCACCTGCAAAG  | AGCCAGCTATGCCCAAGGAAAGAGTG    | GGTATGTCGGCTGAAGAGGGT  | 25515        |
| ALDOC, aldolase C, fructose-bisphosphate              | NM_005165.2    | CTCTAGCTGGGACCGACGG    | AAACCACCACTCAAGGGCTGGATGG     | CTGAGCACAGCGTTCCAAGA   | 21040        |
| CS1, citrate synthase                                 | NM_026444.2    | TCAAGCAGCAACATGGGAAG   | CAGTGGTGGGCCAGATCACTGTGG      | CTCTCATGCCACCGTACATCA  | 21553        |
| FASN, Fatty Acid Synthase                             | NM_007988.     | AGTGGAGGCAGGACCCAAA    | TGAGCCTTTTCTACCGTGTGGCATTG    | AATGGAGAAACGACCCAGCGT  | 25525        |
| GLUT-1, SLC2a1, Facilitated Glucose Transporter 1     | NP_035530      | GGTGTGCAGCAGCCTGTGT    | CGCCACCATCGGCTCCGGTAT         | CACAGTGAAGCCGTGTTGA    | 22771        |
| G6PD2, glucose-6-phosphate dehydrogenase 2            | NM_019468.1    | CGCCTATCCTGGATGCTT     | TGTGGTGCCAGATGCACTTTGTCC      | CAGCCTTCCTGAGTTCATCA   | 21899        |
| GPD1, glycerol-3-phosphate dehydrogenase 1            | NM_010271.2    | AACACAAGGCGCTTGTGGAC   | AGTTCCTTGTCTCACTGCGGTGTACA    | CGGATGAATTCGCCACT      | 27208        |
| GPI1, glucose phosphate isomerase 1                   | NM_008155.1    | AGCTCCAGGCTGCCGG       | CCCAGAAGACTTGGAGAACTCTTGCCA   | GGCCGGTTTCTTCAAAGA     | 23434        |
| Insig1, Insulin induced gene 1                        | NM_153526.     | TCTATATCCGTTCTTGGCTCCC | TTCTCAGGAGGTGTACAGTGGGAAACA   | CACCCATAGTAAGTGTCTCCT  | 25948        |
| PCX, Pyruvate Carboxylase                             | NM_008797.1    | TGCCATCCGAGTGTTCGT     | CGTGCACAGAGCTGGGTATCCGC       | GCTCCGAGTAGACAGCCACTG  | 20056        |
| SLC25a1, Citrate Transporter (mitochondrial)          | AK005070.      | CTTGCTCTACGGCTCCATCC   | CCCAAACCTGACAGCCGCTTG         | GGTTGCTGAGGAACCTGAAACA | 23249        |
| SREBP1a, Sterol Regulatory Element Binding Protein 1A | AC096624.      | AGGCGGCTCTGGAACAGA     | CCAGTTCGCACATCTCGCCAGT        | TGTCGTTCAAACCGCTGTG    | 20809        |
| SREBP1c, Sterol Regulatory Element Binding Protein 1C | AC096624.      | CGGAGCCATGGAATTGCAC    | TAGACATGCTCCAGCTCATCAACAACCAA | GGCCGGGGAAGTCACTGT     | 23665        |
| SCD2, stearoyl-CoA dehydrogenase 2                    | NM_009128.1    | GAACGTGACCCAGCATCC     | AAGATGCCGGCCACATACTGCAA       | GGCTGAGTAAGCCAGAGA     | 22327        |
| SPOT14, thyroid hormone responsive S14                | NM_009381      | CAGCGAGGCTGAGAAGCAC    | CTGCTGAAACGGAGGAGCCGA         | TCCAGCTCTCCGAGATCCT    | 21607        |

| Gene Name                                         | Applied Biosystems ID* | Amplicon Length | F.W. (g/mol) |
|---------------------------------------------------|------------------------|-----------------|--------------|
| ME1, malic enzyme 1, NADP(+)-dependent, cytosolic | Mm00782380_s1          | 86              | 26574        |
| GAPDH, glyceraldehyde-3-phosphate dehydrogenase   | Mm99999915_g1          | 107             | 33063        |
| TE2, Olah, Thdec1, SAST                           | Mm00521437_m1          | 79              | 24411        |

\* Applied Biosystems = Life Technologies
