# Supplementary material
Source: PubMed Central journal article supplement (PMC4031937)

**Supplemental Figure 1**

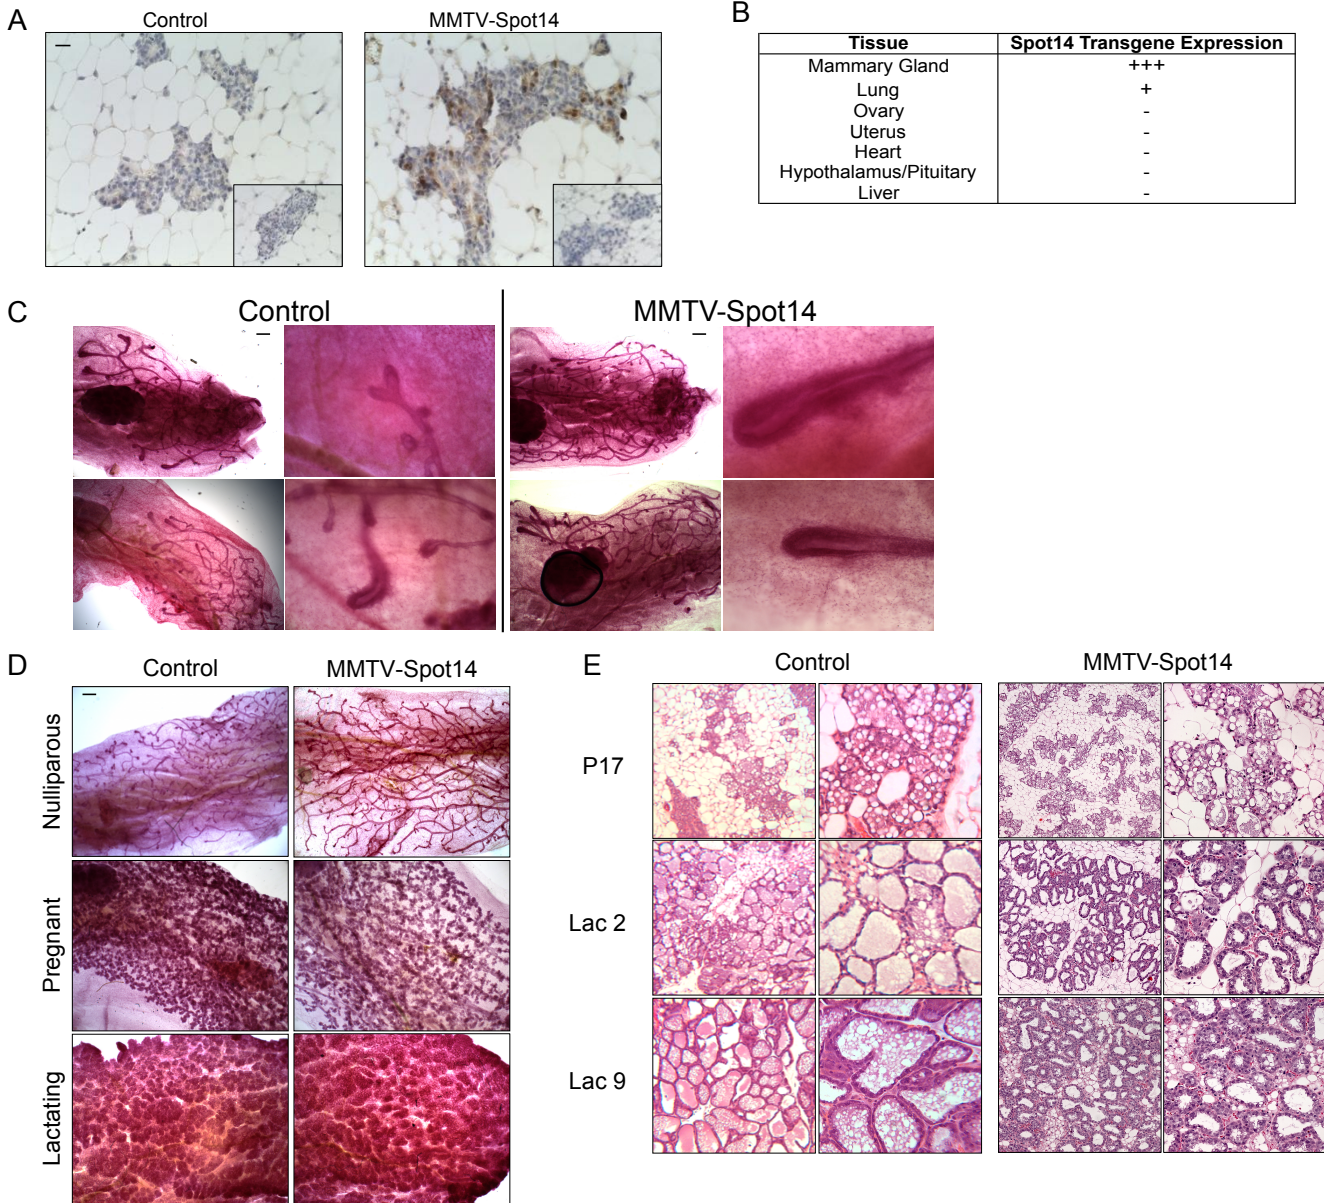

Supplement: supp_M044487_jlr.M044487-1.pdf [file supp_M044487_jlr.M044487-1.pdf]

**Supplemental Figure 2**

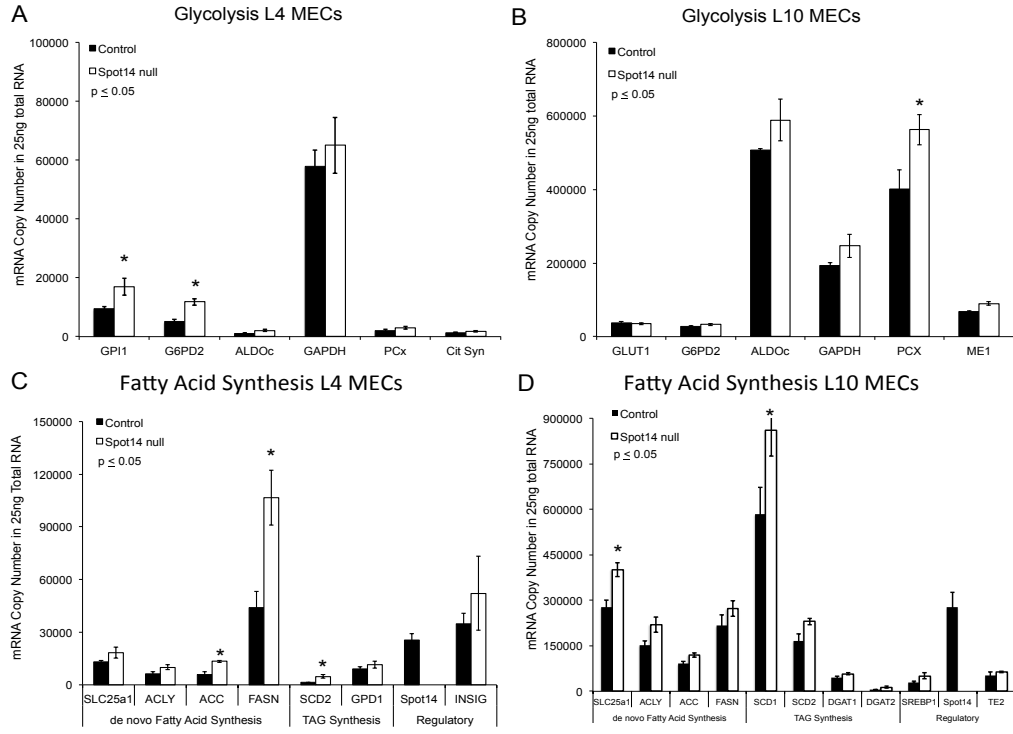

Supplement: supp_M044487_jlr.M044487-2.pdf [file supp_M044487_jlr.M044487-2.pdf]

### Supplemental Figure 3

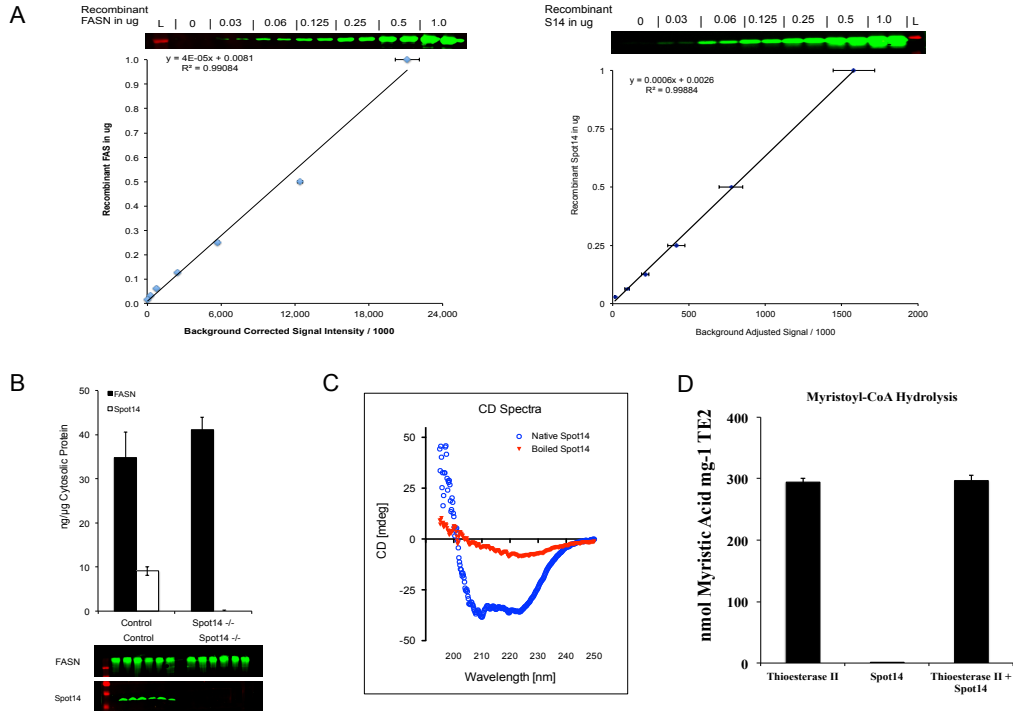

Supplement: supp_M044487_jlr.M044487-3.pdf [file supp_M044487_jlr.M044487-3.pdf]

## Supplemental Figure 4

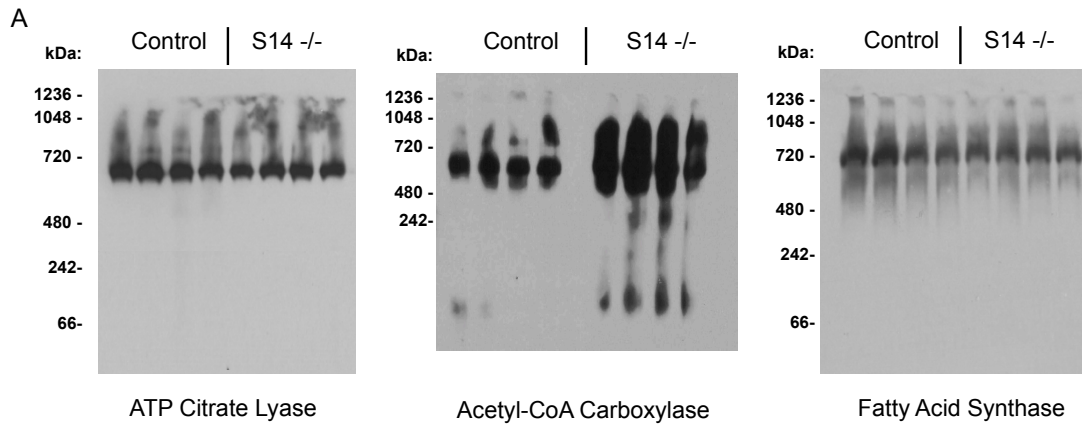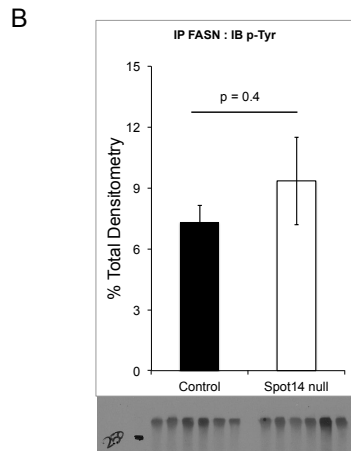

Supplement: supp_M044487_jlr.M044487-4.pdf [file supp_M044487_jlr.M044487-4.pdf]
